# Supplementary material
Source: MDPI journal article supplement (https://www.mdpi.com/2311-7524/8/9/817)
Supplement: s1 [file s1]

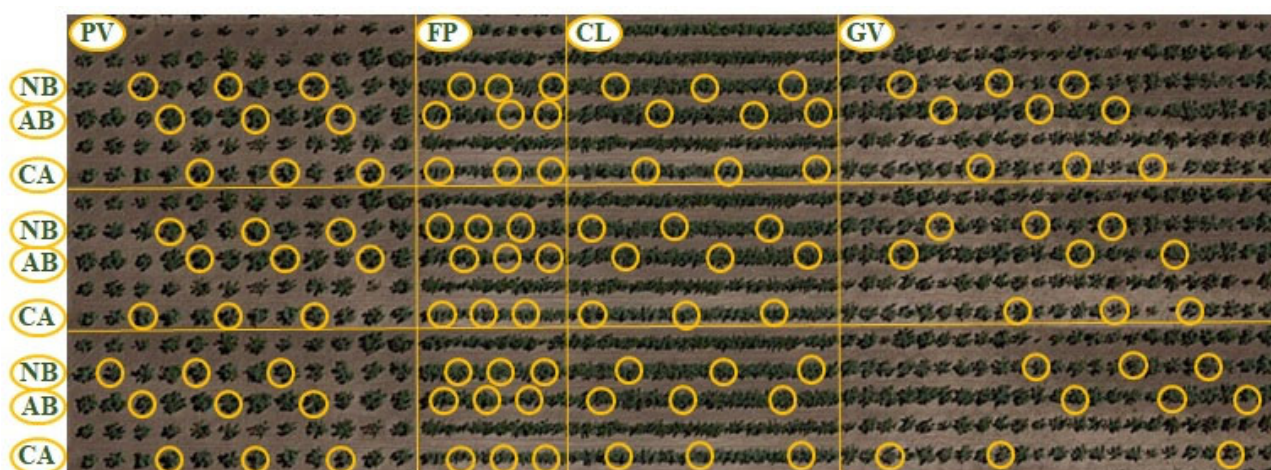

**Figure S1.** Satellite picture of one of the three plots representing the experimental layout. Yellow circles indicate selected trees. PV, polyconic vase; FP, free palmette; CL, central leader; GV, small globe vase. NB, ‘Nocellara del Belice’; AB, ‘Abunara’; CA, ‘Calatina’.
